# Supplementary material for: PD-L1 expression levels on tumor cells affect their immunosuppressive activity
Source: PubMed Central journal article supplement — Oncol Lett. 2019 Sep 20;18(5):5399–407. doi: 10.3892/ol.2019.10903 (PMC6781757; doi:10.3892/ol.2019.10903), 2019-09-20
Supplement: Supplementary_Data.pdf [file Supplementary_Data.pdf]

Table SI. Supplier and catalog number for ELISA kits and all antibodies.

| Product                                                  | Company                   | Catalog number |
|----------------------------------------------------------|---------------------------|----------------|
| Human interferon- $\gamma$ assay kit                     | Cisbio                    | 62HIFNGPET     |
| Human interleukin-2 assay kit                            | Cisbio                    | 62HIL02PET     |
| Anti-CD3                                                 | BD Biosciences            | 555329         |
| Anti-CD28                                                | BD Biosciences            | 555725         |
| Anti-CD274 allophycocyanin                               | eBioscience               | 17-5982-82     |
| Anti-Erk1/2                                              | Cell Signaling Technology | 4695S          |
| Anti-phospho Erk1/2                                      | Cell Signaling Technology | 4370S          |
| Anti-AKT                                                 | Cell Signaling Technology | 4685S          |
| Anti-phospho AKT                                         | Cell Signaling Technology | 4060S          |
| Anti-GAPDH                                               | Cell Signaling Technology | 5174S          |
| Horseradish peroxidase goat anti-rabbit immunoglobulin G | Cell Signaling Technology | 7074S          |

Erk, extracellular signal-regulated kinase; AKT, protein kinase B.
